# Supplementary material
Source: MDPI journal article supplement (https://www.mdpi.com/2037-0164/14/3/53)
Supplement: s1 [file s1]

**Table S3.** Primer combinations used in the second round of PCR across M2 mutants

| <b>Plant Sample</b> | <b>Forward Primer</b> | <b>Reverse Primer</b> |
|---------------------|-----------------------|-----------------------|
| Sample_19-2         | bc_1001_For           | bc_1009_Rev           |
| Sample_18-6         | bc_1001_For           | bc_1010_Rev           |
| Sample_31-3         | bc_1001_For           | bc_1011_Rev           |
| Sample_39-6         | bc_1001_For           | bc_1012_Rev           |
| Sample_9-3          | bc_1001_For           | bc_1013_Rev           |
| Sample_36-5         | bc_1001_For           | bc_1014_Rev           |
| Sample_33-7         | bc_1001_For           | bc_1016_Rev           |
| Sample_29-3         | bc_1006_For           | bc_1009_Rev           |
| Sample_26-4         | bc_1006_For           | bc_1013_Rev           |
| Sample_9-1          | bc_1006_For           | bc_1014_Rev           |
| Sample_5-1          | bc_1006_For           | bc_1015_Rev           |
| Sample_31-6         | bc_1006_For           | bc_1016_Rev           |
| Sample_19-4         | bc_1007_For           | bc_1009_Rev           |
| Sample_33-5         | bc_1007_For           | bc_1010_Rev           |
| Sample_2-1          | bc_1007_For           | bc_1011_Rev           |
| Sample_16-4         | bc_1007_For           | bc_1012_Rev           |
