# Supplementary material
Source: MDPI journal article supplement (https://www.mdpi.com/2037-0164/14/3/53)
Supplement: s1 [file s1]

**Table S2.** Sequences of primers used in the second round of PCR

| <b>Primer<br/>Identity</b> | <b>Sequence (direction 5' to 3')</b>                  |
|----------------------------|-------------------------------------------------------|
| bc_1001_For                | /5phos/CACATATCAGAGTGCGgcagtcgaacatgtagctgactcaggtcac |
| bc_1006_For                | /5phos/CATATATATCAGCTGTgcagtcgaacatgtagctgactcaggtcac |
| bc_1007_For                | /5phos/TCTGTATCTCTATGTGgcagtcgaacatgtagctgactcaggtcac |
| bc_1009_Rev                | /5phos/TCTGTCTCGCGTGTGtggatcacttgtgcaagcatcacatcgtag  |
| bc_1010_Rev                | /5phos/CTCTGAGATAGCGCGTtggatcacttgtgcaagcatcacatcgtag |
| bc_1011_Rev                | /5phos/ATAGATATACGTATAGtggatcacttgtgcaagcatcacatcgtag |
| bc_1012_Rev                | /5phos/ACACGCGATCTAGTGTtggatcacttgtgcaagcatcacatcgtag |
| bc_1013_Rev                | /5phos/CTCGCGTATGCGAGAGtggatcacttgtgcaagcatcacatcgtag |
| bc_1014_Rev                | /5phos/ACGCGCGCGTAGTGAGtggatcacttgtgcaagcatcacatcgtag |
| bc_1015_Rev                | /5phos/ACACACGTGTCATGCGtggatcacttgtgcaagcatcacatcgtag |
| bc_1016_Rev                | /5phos/ATACTATCTCTCTATGtggatcacttgtgcaagcatcacatcgtag |
