# Supplementary material
Source: MDPI journal article supplement (https://www.mdpi.com/2037-0164/14/3/53)
Supplement: s1 [file s1]

**Table S1.** Sequences of primers used in the first round of PCR

| Primer Identity | Sequence (direction 5' to 3')                                          |
|-----------------|------------------------------------------------------------------------|
| CEN1_FOR        | /5AmMC6/gcagtcgaacatgtagctgactcaggtcacCTC CTC CTT TGC AAC ATT ATC A    |
| CEN2_FOR        | /5AmMC6/gcagtcgaacatgtagctgactcaggtcacGGT CCC ATA TTT TTT ATG CCT TC   |
| CEN4_FOR        | /5AmMC6/gcagtcgaacatgtagctgactcaggtcacCCT TTA ATC TTG AAG CCT GAA CA   |
| TFL1_FOR        | /5AmMC6/gcagtcgaacatgtagctgactcaggtcacGTA TTT TGC ACT TCT CTT CTC AC   |
| MFT1_FOR        | /5AmMC6/gcagtcgaacatgtagctgactcaggtcacCGT AAG TGA CCA AAA TCC TTG TAA  |
| MFT2_FOR        | /5AmMC6/gcagtcgaacatgtagctgactcaggtcacCAG CCA CGT CAG CAT TAA CAT GA   |
| CEN1_REV        | /5AmMC6/ tggatcacttgtgcaagcatcacatcgtagGTA CAA AGT CGT TGT ACT AGC A   |
| CEN2_REV        | /5AmMC6/ tggatcacttgtgcaagcatcacatcgtagATG GAT CAA TCA AAC GCT ACT AAG |
| CEN4_REV        | /5AmMC6/ tggatcacttgtgcaagcatcacatcgtagCTA CAT GAT GCA TGA ACA TGA CA  |
| TFL1_REV        | /5AmMC6/ tggatcacttgtgcaagcatcacatcgtagGAA GAG AGT AAA CAA CAC TAA CC  |
| MFT1_REV        | /5AmMC6/ tggatcacttgtgcaagcatcacatcgtagGTG CCA AAA CAG AAA ACA CAC AA  |
| MFT2_REV        | /5AmMC6/ tggatcacttgtgcaagcatcacatcgtagACG AGT CGT GAC ATG AAA CAG TA  |
