# Supplementary material
Source: MDPI journal article supplement (https://www.mdpi.com/2037-0164/14/3/53)
Supplement: s1 [file s1]

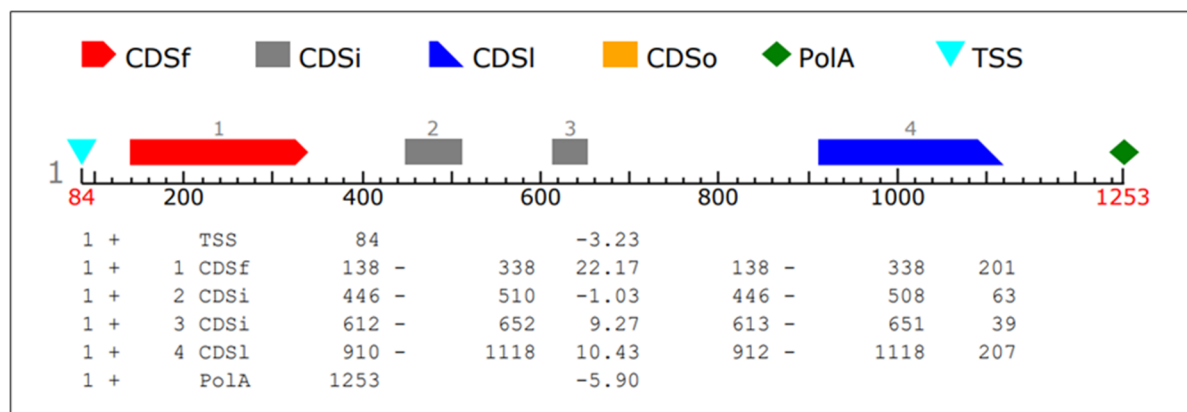

**Figure S1.** The gene structure of *SmMFT-2* as predicted using Fgenesh gene prediction tool. CDSf indicates the first CDS (which starts with a start codon at 138<sup>th</sup> position in this image), CDSi indicates internal exon, CDSo indicates outer exon, and CDSl indicates the last coding sequence (which ends with a stop codon), TSS indicates Transcription Start Site and PolA indicates poly-A tail.
