# Supplementary material
Source: MDPI journal article supplement (https://www.mdpi.com/2037-0164/14/3/53)
Supplement: s1 [file s1]

Archive with 5 entries (5 files):
- Figure S1.pdf
- Figure S2.pdf
- Table S1.pdf
- Table S2.pdf
- Table S3.pdf
